# Supplementary material
Source: PubMed Central journal article supplement (PMC2491339)
Supplement: mmc1.pdf [file mmc1.pdf]

## Supplemental Data

### FISH Mapping of de novo Apparently Balanced Chromosome Rearrangements Identifies Characteristics Associated with Phenotypic Abnormality

J.A. Fantes, E. Boland, J. Ramsay, D. Donnai, M. Splitt, J.A. Goodship, H. Stewart, M. Whiteford, P. Gautier, L. Harewood, S. Holloway, F. Sharkey, E. Maher, V. van Heyningen, J. Clayton-Smith, D.R. Fitzpatrick, and G.C.M. Black

**Table S1. Cytogenetic and FISH Localization of Breakpoints in Cases and Controls**

| Group        | Number | AB    | Code     | ABCR (Cyto BP)              | ABCR (FISH BP)          |
|--------------|--------|-------|----------|-----------------------------|-------------------------|
| <b>Cases</b> | 1      | XAT   | GILLE    | t(X;11)(p22.3;p12)          | t(X;11)(p22.2; p11.2)   |
|              | 2      | Recip | MARTA    | t(8;9)(q21;q21)             | t(8;9)(q22.1;q21.13)    |
|              | 3      | Recip | SG-3301  | t(2;17)(q32;q24)pat         | t(2;17)(q32.1;q24.3)pat |
|              | 4      | Recip | ROOJA    | t(5;7)(q21;q33)             | t(5;7)(q14.3;q22.1)     |
|              | 5      | Recip | MAGAN    | t(3;4)(q23;q31)             | t(3;4)(q23;q31.22)      |
|              | 6      | Inv   | CRENA    | inv(4)(q21q35)              | inv(4)(q21.22q35)       |
|              | 7      | Recip | F92-2253 | t(5;11)(q15;p15.5)          | t(5;11)(q15;p15.5)      |
|              | 8      | Recip | T86-0593 | t(5;12)(q11.2;q12)          | t(5;12)(q11.1;q11)      |
|              | 9      | Inv   | GILL     | inv(12)(p11.2q24.3)         | inv(12)(p11.21q24.31)   |
|              | 10     | Recip | B97-1182 | t(2;10)(q11.2;q22.3)        | t(2;10)(q11.2;q22.3)    |
|              | 11     | Recip | B01-2958 | t(4;14)(q31.22;q11.2)       | t(4;14)(q31.22;q11.2)   |
|              | 12     | Recip | B96-0581 | t(2;3)(q21.3;q21.3)         | t(2;3)(q11.2;q13.31)    |
|              | 13     | XAT   | F03-0432 | t(X;8)(q26.2;p23.2)         | t(X;8)(q26.2;p23.2)     |
|              | 14     | Recip | B01-2957 | t(14;18)(q24.1;p11.32)      | t(14;18)(q24.2;p11.32)  |
|              | 15     | Recip | B99-1983 | t(13;18)(q31.1/q22.3;q22.1) | t(13;18)(q31.1;q22.2)   |
|              | 16     | Recip | B04-0611 | t(1;9)(p32.3;q33.2)         | t(1;9)(p31.1;q31.3)     |
|              | 17     | Inv   | B90748   | inv(1)(p36.1q25.3)          | inv(1)(p31.3q25.1)      |

*AJHG*, Volume 82

|    |       |              |                             |                                  |
|----|-------|--------------|-----------------------------|----------------------------------|
| 18 | Recip | CMS5859      | t(3;7)(q28;p21.3)           | t(3;7)(q28;p21.3)                |
| 19 | Recip | B04-0880     | t(2;3)(q32.2/q33;q26.3/q27) | t(2;3)(q33.1;q26.33)             |
| 20 | Recip | T86-0404     | t(2;6)(p23;q14)             | t(2;6)(p22.3;q12)                |
| 21 | Recip | CV1012       | t(5;17)(q15;q23)pat         | t(5;17)(q15;q24.3)pat            |
| 22 | Recip | NCL-B04-2316 | t(3;6)(q23;p21.1)           | t(3;6)(q21.3;p21.1)              |
| 23 | Recip | COLJA        | t(11;13)(p15.3;q22)         | t(11;13)(p15.4;q22.1)            |
| 24 | Recip | B00213       | t(2;7)(q33;p21)             | t(2;7)(q33.1;p21.1)              |
| 25 | Recip | BB45         | t(2;11)(q32;p14)            | t(2;11)(q33.1;p13)               |
| 26 | XAT   | BL02-1299    | t(X;10)(q22.3;q24.3)        | t(X;10)(q23;q25.1)               |
| 27 | XAT   | BL02-0828    | t(X;11)(q21.2;q13.5)        | t(X;11)(q21.31;q14.1)            |
| 28 | Recip | F0124/00     | t(2;16)(p15;q22)            | t(2;16)(p14;q21/q22.1)           |
| 29 | Recip | BL02-3104    | t(9;22)(q34.2;q11.21)       | t(9;22)(q34.2;q11.21)            |
| 30 | Recip | AC114        | t(10;11)(q24;p13)           | t(10;11)(q24.2;p12)              |
| 31 | Recip | BL03-1791    | t(7;8)(q32.2;q22)           | t(7;8)(q22.1;q22.1)              |
| 32 | Recip | CV345        | t(6;9)(p23;q22.3)           | t(6;9)(p24.3;q22.33)             |
| 33 | Inv   | BL02-2567    | inv(1)(q32.1q44)            | inv(1)(q41q42.2)inv(1)(q42.3q44) |
| 34 | Recip | BL03-0967    | t(9;20)(p13.1;p13)          | t(9;20)(p13.3;p13)               |
| 35 | Recip | BL03-1789    | t(5;9)(p13.1;q22.1)         | t(5;9)(p12;q21.11)               |
| 36 | Recip | BL03-2425    | t(11;13)(p15;q32)           | t(11;13)(p15.4;q32.1)            |
| 37 | Recip | CV1222       | t(1;7)(q21.3;q34)           | t(1;7)(q23.2;q34)                |
| 38 | Recip | BL04-0107    | t(5;6)(q13;q23)             | t(5;6)(q14.3;q25.1)              |
| 39 | Recip | BL03-3077    | t(1;20)(q32.1;q13.3)        | t(1;20)(q31.3;q13.32)            |
| 40 | Recip | CV1456       | t(1;2)(q24.2;q31.3)         | t(1;2)(q24.1;q31.1)              |
| 41 | Recip | BL04-2026    | t(5;6)(q15;q25.1)           | t(5;6)(q14.3;q25.1)              |
| 42 | Recip | BL04-2240    | t(9;15)(q21.2;q26)          | t(9;15)(q21.33;q26.2)            |
| 43 | XAT   | BL04-3772    | t(X;4)(p11.4;p16)           | t(X;4)(p21.1;p16.2)              |
| 44 | Recip | BL04-1899    | t(6;16)(q15;q13)            | t(6;16)(q16.1;q21)               |

*AJHG*, Volume 82

|                 |    |       |           |                            |                            |
|-----------------|----|-------|-----------|----------------------------|----------------------------|
|                 | 45 | Recip | BL05-0692 | t(1;13)(q44;q32)           | t(1;13)(q44;q32.1)         |
|                 | 46 | Recip | BL03-2183 | t(5;14)(q15;q24)           | t(5;14)(q21.3/q22.1;q31.1) |
| <b>Controls</b> | 1  | Recip | B98-0026  | t(1;15)(q24.3;q22.3)       | t(1;15)(q25.2;q24.2)       |
|                 | 2  | Recip | F00-1558  | t(15;16)(q22.3;q22.1)      | t(15;16)(q24.2;q22.1)      |
|                 | 3  | Recip | B97-0349  | t(3;11)(p13;q12.2)         | t(3;11)(p14.1;q11)         |
|                 | 4  | Recip | B04-0088  | t(3;9)(p26;p22)            | t(3;9)(p26.3;p21.3)        |
|                 | 5  | Recip | F96-1781  | t(5;6)(q31.3;p21.3)        | t(5;6)(q32;p22.2)          |
|                 | 6  | Inv   | SISCO     | inv(1)(p31q43)             | inv(1)(p13.3q32.3)         |
|                 | 7  | Recip | PETEN     | t(7;12)(q32;p13)           | t(7;12)(q32.2;p13.32)      |
|                 | 8  | Recip | EDINN     | t(1;14)(q42;q11)           | t(1;14)(q41;q11.2)         |
|                 | 9  | Recip | JOGAR     | t(X;14)(p11.21;q32.2/32.3) | t(X;14)(p11.3;q32.33)      |
|                 | 10 | Recip | B01-2804  | t(4;12)(p16.1;q24.31)      | t(4;12)(p16.1;q24.23)      |
|                 | 11 | Recip | BL03-0187 | t(2;8)(p15;q13)            | t(2;8)(p16.3;q21.11)       |
|                 | 12 | Recip | BL03-0186 | t(1;7)(p32;q34)            | t(1;7)(p32.1;q35)          |
|                 | 13 | Recip | BL03-0185 | t(2;4)(q37.1;p15.32)       | t(2;4)(q37.2;p15.33)       |
|                 | 14 | Recip | BL03-0362 | t(2;5)(q31;q33.3)          | t(2;5)(q32.1;q34)          |
|                 | 15 | Recip | BL03-0356 | t(3;12)(q27;p13)           | t(3;12)(q27.1;p13.32)      |
|                 | 16 | Recip | BL03-0426 | t(4;11)(q31;p13)           | t(4;11)(q28.3;p12)         |
|                 | 17 | Recip | BL03-1970 | t(6;15)(q23.1;q21.2)       | t(6;15)(q23.2;q21.3)       |
|                 | 18 | Recip | BL03-1979 | t(6;14)(q32;q32.1)         | t(6;14)(q22.33;q31.3)      |
|                 | 19 | Recip | F0440     | t(8;15)(q22;q22.1)         | t(8;15)(q21.11;q21.1)      |
|                 | 20 | Recip | BL03-0876 | t(1;11)(q42.1;p15.5)       | t(1;11)(q44;p15.5)         |
|                 | 21 | Recip | BL03-3032 | t(5;18)(p15.1;p11.32)      | t(5;18)(p15.2;p11.31)      |
|                 | 22 | Recip | BL04-0339 | t(5;6)(q11.2;q23.1)        | t(5;6)(q12.3;q24.1)        |
|                 | 23 | Inv   | BL03-2725 | inv(14)(q22.1q32.1)        | inv(14)(q21.3q31.3)        |
|                 | 24 | Recip | BL04-2024 | t(5;7)(p15.1;q31.2)        | t(5;7)(p14.1;q31.2)        |
|                 | 25 | Recip | BL04-2025 | t(3;6)(q25;q15)            | t(3;6)(q26.1;q15)          |

*AJHG*, Volume 82

|    |       |           |                    |                            |
|----|-------|-----------|--------------------|----------------------------|
| 26 | Recip | CV1510    | t(6;14)(p23;q13)   | t(6;14)(p22.2;q12)         |
| 27 | Recip | BL04-3994 | t(3;9)(p25;q13)    | t(3;9)(p26.3/p26.2;q21.13) |
| 28 | Recip | BL04-4270 | t(6;8)(q25;q12)    | t(6;8)(q24.2;q12.1)        |
| 29 | Recip | BL05-0379 | t(5;9)(p14;p13.1)  | t(5;9)(p14.1;p13.2)        |
| 30 | Recip | BL03-2435 | t(6;12)(q21;q24.1) | t(6;12)(q16.3;q23.1)       |

“Recip” denotes “reciprocal translocation.”

“Inv” denotes “inversion.”

“XAT” denotes “X-autosome translocation.”

**Table S2. Breakpoint-Localizing FISH Probes for Cases and Controls**

| Group        | Number** | Gene Interrupted | FISH BP  | Proximal Probe*     | BP Spanning 1 | BP Spanning 2 | BP Spanning 3 | Distal Probe*       |
|--------------|----------|------------------|----------|---------------------|---------------|---------------|---------------|---------------------|
| <b>Cases</b> | 1        | Yes              | Xp22.2   |                     | RP11-311A17   | RP11-50B1     | RP11-81G16    |                     |
|              | 1        | Yes              | 11p11.2  |                     | RP11-618K13   |               |               |                     |
|              | 2        | No               | 8q22.1   |                     | RP11-328L11   |               |               |                     |
|              | 2        | Yes              | 9q21.13  |                     | RP11-71A24    |               |               |                     |
|              | 3        | No               | 2q32.1   |                     | CTD-2053I13   |               |               |                     |
|              | 3        | No               | 17q24.3  |                     | RP11-1003J3   |               |               |                     |
|              | 4        | Yes              | 5q14.3   |                     | RP11-433H20   | 111M24        | 159L1         |                     |
|              | 4        | Yes              | 7q22.1   |                     | RP11-984K9    | RP11-401L13   |               |                     |
|              | 5        | Yes              | 3q23     |                     | RP11-316C10   | RP11-831N10   |               |                     |
|              | 5        | Yes              | 4q31.22  |                     | RP11-552I10   |               |               |                     |
|              | 6        | No               | 4q21.22  |                     | RP11-263F19   |               |               |                     |
|              | 6        | Unknown          | 4q35     |                     | cT379         |               |               |                     |
|              | 7        | Yes              | 5q15     |                     | RP11-126G10   | RP11-641C22   |               |                     |
|              | 7        | No               | 11p15.5  |                     | RP4-539G11    | RP11-889I17   |               |                     |
|              | 8        | No               | 5q11.1   | Centromeric Repeats |               |               |               | RP11-185I4          |
|              | 8        | No               | 12q11    | Centromeric Repeats |               |               |               | Centromeric Repeats |
|              | 9        | No               | 12p11.21 |                     | RP13-359K18   |               |               |                     |
|              | 9        | Yes              | 12q24.31 |                     | RP11-665J20   |               |               |                     |
|              | 10       | Unknown          | 2q11.2   | RP11-549H5          |               |               |               | RP11-292K15         |
|              | 10       | Unknown          | 10q22.3  |                     | RP11-428P16   |               |               |                     |
|              | 11       | No               | 4q31.22  |                     | RP11-184E7    |               |               |                     |
|              | 11       | Unknown          | 14q11.2  | RP11-1080M7         | RP11-244E17   |               |               | RP11-929J10         |

AJHG, Volume 82

|    |         |          |             |             |             |  |             |
|----|---------|----------|-------------|-------------|-------------|--|-------------|
| 12 | Unknown | 2q11.2   |             |             |             |  |             |
| 12 | Unknown | 3q13.31  |             | RP11-553L6  | RP11-107J18 |  |             |
| 13 | Yes     | Xq26.2   |             | RP3-448E20  |             |  |             |
| 13 | No      | 8p23.2   |             | RP11-728L1  |             |  |             |
| 14 | Unknown | 14q24.2  |             | RP11-41B1   |             |  |             |
| 14 | No      | 18p11.32 |             | RP11-267C19 | RP11-78F17  |  |             |
| 15 | No      | 13q31.1  | RP11-521J24 |             |             |  | RP11-421K11 |
| 15 | Del/Dup | Del      | RP11-365J7  |             |             |  | RP11-632L2  |
| 15 | No      | 18q22.2  |             | RP11-384E22 | RP11-430H7  |  |             |
| 16 | No      | 1p31.1   |             | RP11-386O9  |             |  |             |
| 16 | Yes     | 9q31.3   |             | RP11-272D1  |             |  |             |
| 17 | No      | 1p31.3   |             | RP4-535B20  |             |  |             |
| 17 | Yes     | 1q25.1   |             | RP5-1141O19 | RP1-262D12  |  |             |
| 18 | No      | 3q28     |             | RP11-332P22 |             |  |             |
| 18 | Del/Dup | Del      | RP11-496M9  |             |             |  | RP1-296J4   |
| 18 | Unknown | 7p21.3   |             | RP11-135E21 |             |  |             |
| 19 | No      | 2q33.1   |             | RP11-258L23 |             |  |             |
| 19 | No      | 3q26.33  |             | RP11-43F17  |             |  |             |
| 20 | No      | 2p22.3   | RP11-257N21 |             |             |  | RP11-153O16 |
| 20 | No      | 6q12     |             | RP11-365P20 |             |  |             |
| 21 | No      | 5q15     |             | RP11-496M2  |             |  |             |
| 21 | No      | 17q24.3  |             | RP11-420O5  |             |  |             |
| 22 | Yes     | 3q21.3   | RP11-177O2  |             |             |  | RP3-519C2   |
| 22 | Yes     | 6p21.1   |             | RP1-244F24  | 427I13      |  |             |
| 23 | No      | 11p15.4  |             | RP11-92N11  | RP11-120E20 |  |             |
| 23 | No      | 13q22.1  |             | RP11-309H15 |             |  |             |

AJHG, Volume 82

|    |         |                 |               |               |             |           |              |
|----|---------|-----------------|---------------|---------------|-------------|-----------|--------------|
| 24 | Yes     | 2q33.1          |               | RP11-530J6    |             |           |              |
| 24 | No      | 7p21.1          |               | RP11-455A9    | RP11-455K15 | RP11-30M5 |              |
| 25 | No      | 2q33.1          |               | RP11-505H14   |             |           |              |
| 25 | No      | 11p13           |               | RP1-305G21    |             |           |              |
| 26 | No      | 10q25.1         |               | RP11-469M2    |             |           |              |
| 26 | No      | Xq23            |               | RP11-537J24   |             |           |              |
| 27 | No      | 11q14.1         | RP11-730C14   |               |             |           | RP11-816L8   |
| 27 | No      | Xq21.31         | RP13-212L9    |               |             |           | RP13-24G8    |
| 27 | Del/Dup | Del             |               | RP11-179A16   |             |           |              |
| 28 | No      | 2p14            |               | RP11-30P5     |             |           |              |
| 28 | No      | 16q21           | RP11-256I9    |               |             |           | RP11-298C15  |
| 29 | Yes     | 9q34.13         |               | G248P88004A10 |             |           |              |
| 29 | Unknown | 22q11.21        | RP11-466H9    |               |             |           | RP11-481H20  |
| 30 | Yes     | 10q24.2         |               | RP11-34A14    |             |           |              |
| 30 | No      | 11p12           |               | RP11-64I17    |             |           |              |
| 31 | No      | 8q22.1          |               | RP11-347C18   |             |           |              |
| 31 | Yes     | 7q22.1          | RP11-333G13   |               |             |           | RP11-163E9   |
| 32 | No      | 6p24.3          | RP11-12I14    |               |             |           | RP1-90O12    |
| 32 | Yes     | 9q22.33         | G248P87972G12 |               |             |           | G248P80977B9 |
| 33 | Del/Dup | Del q42.2       |               | RP11528D17    |             |           |              |
| 33 | Del/Dup | Del q43-44      | RP11-553N16   |               |             |           | RP11-411G13  |
| 33 | Del/Dup | Inv q32.3;q42.2 | RP11-66M7     |               |             |           | RP11-99J16   |
| 33 | Del/Dup | Inv q42.3;q44   | RP11-509I1    |               |             |           | CTB-160H23   |
| 34 | No      | 9p13.3          |               | RP11-251H13   |             |           |              |
| 34 | Yes     | 20p13           | RP5-1187M17   |               |             |           | RP11-794I6   |
| 35 | No      | 5p12            | RP11-143E24   |               |             |           | RP11-34D23   |

AJHG, Volume 82

|  |    |         |                       |               |             |  |  |              |
|--|----|---------|-----------------------|---------------|-------------|--|--|--------------|
|  | 35 | Unknown | 9q21.11               | RP11-265B8    |             |  |  | RP11-141J10  |
|  | 36 | Yes     | 13q32.1               | RP11-318K19   |             |  |  | RP11-83D23   |
|  | 36 | Unknown | 11p15.4               |               | RP11-89E5   |  |  |              |
|  | 37 | No      | 1q23.2                | RP11-550P17   |             |  |  | RP11-180D21  |
|  | 37 | Yes     | 7q34                  | RP11-759K14   |             |  |  | RP4-592P3    |
|  | 38 | Yes     | 6q25.1                | RP1-144O21    |             |  |  | RP1-281H8    |
|  | 38 | No      | 5q14.3                |               | RP11-348K15 |  |  |              |
|  | 39 | Del/Dup | 20q13.32              | G248P83716B4  | RP5-1059L7  |  |  | RP11-402F1   |
|  | 39 | Unknown | 1q31.3                |               | RP11-332L8  |  |  |              |
|  | 40 | Yes     | Del 2q22.2            | RP11-285H23   |             |  |  | RP11-107E5   |
|  | 40 | Unknown | 2q31.1                | RP11-158L8    |             |  |  | RP11-205B19  |
|  | 40 | Unknown | 1q24.1                | RP11-306I1    |             |  |  | RP11-702J19  |
|  | 41 | No      | 5q14.3                | RP11-24O11    |             |  |  | RP11-302L17  |
|  | 41 | Yes     | 6q25.1                | RP11-99E18    |             |  |  | RP1-297M16   |
|  | 42 | No      | 15q26.2               | RP11-522B15   |             |  |  | RP11-78F1    |
|  | 42 | No      | 9q21.31               |               | RP11-394O9  |  |  |              |
|  | 43 | Unknown | 4p16.2                | G248P8903E10  |             |  |  | G248P81939D6 |
|  | 43 | No      | Xp21.1                | RP11-281B1    |             |  |  | RP11-330k13  |
|  | 44 | No      | 16q21                 | RP11-133B5    |             |  |  | RP11-22H12   |
|  | 44 | No      | 6q16.1                |               | G248P8547E3 |  |  |              |
|  | 45 | No      | 13q32.1               | G248P81419A12 |             |  |  | G248P86855F5 |
|  | 45 | No      | 1q44                  | G248P89661B9  |             |  |  |              |
|  | 46 | Yes     | Dup 5q21.3 -<br>q22.1 | RP11-319P13   |             |  |  | RP11-252I13  |
|  | 46 | Yes     | Del 5q21.3 -<br>q22.1 | RP11-174L14   |             |  |  | RP11-231G15  |
|  | 46 | Del/Dup | Ins 6q                | RP11-276O18   |             |  |  | RP11-1146A18 |

AJHG, Volume 82

|                 |    |         |          |             |             |             |            |             |
|-----------------|----|---------|----------|-------------|-------------|-------------|------------|-------------|
|                 | 46 | Unknown | 14q31.1  |             | RP11-299L17 |             |            |             |
| <b>Controls</b> | 1  | Yes     | 1q25.2   |             | RP11-52I18  |             |            |             |
|                 | 1  | Unknown | 15q24.2  |             | RP11-593F23 | RP11-685G9  |            |             |
|                 | 2  | Unknown | 15q24.2  |             | RP11-24M17  |             |            |             |
|                 | 2  | Unknown | 16q22.1  |             | RP11-1145H8 | RP11-510M2  |            |             |
|                 | 3  | Yes     | 3p14.1   |             | RP11-253K11 | RP11-40E22  |            |             |
|                 | 3  | Unknown | 11q11    |             | RP11-367C21 |             |            |             |
|                 | 4  | Unknown | 3p26.3   |             | RP11-86C13  | RP11-952H14 |            |             |
|                 | 4  | No      | 9p21.3   |             | RP11-594J14 |             |            |             |
|                 | 5  | Unknown | 5q32     | RP11-25F13  | RP11-153J20 |             |            | CTC-370H24  |
|                 | 5  | Unknown | 6p22.2   |             | RP11-95P3   |             |            |             |
|                 | 6  | Yes     | 1p13.3   |             | RP11-352P4  | RP11-911H2  | RP11-297O4 |             |
|                 | 6  | No      | 1q32.3   |             | RP11-372M18 |             |            |             |
|                 | 7  | No      | 7q32.2   |             | RP11-2E11   |             |            |             |
|                 | 7  | Yes     | 12p13.32 |             | RP11-916H17 | RP5-1180D12 |            |             |
|                 | 8  | No      | 1q41     |             | RP11-421L10 |             |            |             |
|                 | 8  | Unknown | 14q11.2  |             | RP11-98N22  |             |            |             |
|                 | 9  | Yes     | Xp11.3   |             | RP5-1158H2  | RP11-573N21 |            |             |
|                 | 9  | Yes     | 14q32.33 |             | RP11-982M15 | RP11-716K17 |            |             |
|                 | 10 | No      | 4p16.1   | RP11-770E1  |             |             |            | RP11-136I13 |
|                 | 10 | Yes     | 12q24.23 | RP11-110J12 |             |             |            | RP11-465L8  |
|                 | 11 | No      | 2p16.3   | RP11-460M2  |             |             |            | RP11-152D8  |
|                 | 11 | No      | 8q21.11  |             | RP11-758M4  |             |            |             |
|                 | 12 | Yes     | 1p32.1   |             | RP11-242B9  |             |            |             |
|                 | 12 | Yes     | 7q35     | RP4-545C24  |             |             |            | RP4-721B17  |
|                 | 13 | Yes     | 2q37.2   | RP11-84G18  |             |             |            | RP11-473L20 |

*AJHG*, Volume 82

|    |         |          |               |              |              |  |               |
|----|---------|----------|---------------|--------------|--------------|--|---------------|
| 13 | Yes     | 4p15.33  | RP11-484O2    |              |              |  | RP11-1087G16  |
| 14 | Yes     | 2q32.1   | RP11-363K21   |              |              |  | RP11-1148B13  |
| 14 | No      | 5q34     | RP11-118E6    |              |              |  | RP11-511M9    |
| 15 | Yes     | 12p13.32 | G248P84904G3  |              |              |  | G248P8258A7   |
| 15 | No      | 3q27.1   |               | RP11-307B12  |              |  |               |
| 16 | No      | 11p12    | RP11-330I10   |              |              |  | RP11-313M3    |
| 16 | No      | 4q28.3   | RP11-356A12   |              |              |  | RP11-782E2    |
| 17 | No      | 6q23.2   | RP1-258L1     |              |              |  | RP3-352A20    |
| 17 | No      | 15q22.2  | G248P87450F6  |              |              |  | G248P86114E3  |
| 18 | Yes     | 6q23.2   | RP11-197K23   |              |              |  | RP11-103C16   |
| 18 | No      | 14q31.3  | RP11-126I9    |              |              |  | RP11-504I1    |
| 19 | Unknown | 8q21.11  | G248P89985B9  |              |              |  | G248P8997H8   |
| 19 | No      | 15q21.1  | RP11-81G13    |              |              |  | RP11-90J19    |
| 20 | Yes     | 1q44     |               | RP11-522M21  |              |  |               |
| 20 | Unknown | 11p15.4  |               | G248P81220F7 | G248P82039E3 |  |               |
| 21 | No      | 5p15.2   | G248P84750F11 |              |              |  | G248P80586E8  |
| 21 | Unknown | 18p11.31 | G248P8540A4   |              |              |  | RP11-106J7    |
| 22 | No      | 6q24.1   | RP11-515I12   |              |              |  | RP11-432L12   |
| 22 | Yes     | 5q12.3   | RP11-19B7     |              |              |  | RP11-5N2      |
| 23 | Unknown | 14q21.3  | G248P80298H4  |              |              |  | G248P87607C11 |
| 23 | Yes     | 14q31.3  |               | G248P83151G6 |              |  |               |
| 24 | Yes     | 7q31.2   | RP11-76C12    |              |              |  | CTB-1013N12   |
| 24 | No      | 5p14.1   | RP11-500H9    |              |              |  | RP11-192H6    |
| 25 | No      | 3q26.1   | RP11-535I24   |              |              |  | RP11-90M7     |
| 25 | No      | 6q15     |               | RP11-565A2   |              |  |               |
| 26 | Unknown | 6p22.2   | RP11-111F20   |              |              |  | G248P82409E12 |

*AJHG*, Volume 82

|  |    |         |         |               |              |              |              |             |
|--|----|---------|---------|---------------|--------------|--------------|--------------|-------------|
|  | 26 | Yes     | 14q12   | RP11-452K13   |              |              |              | RP11-159B13 |
|  | 27 | Yes     | 3p26.2  | RP11-6301     |              |              |              | RP11-785A7  |
|  | 27 | No      | 9q21.3  | RP11-217F16   | RP11-429L21  |              |              | RP11-28P17  |
|  | 28 | Unknown | 6q24.2  | RP11-485E9    |              |              |              | RP11-3B11   |
|  | 28 | No      | 8q12.1  | RP11-342K10   |              |              |              | RP11-513O17 |
|  | 29 | No      | 5p14.1  | RP11-560A7    |              |              |              | RP11-100E22 |
|  | 29 | Yes     | 9p13.2  |               | RP11-392E22  |              |              |             |
|  | 29 | Yes     | Dup     | G248P82869H12 | G248P81638E3 | G248P89472F3 | G248P86044F7 | RP13-198D9  |
|  | 30 | No      | 6q16.3  | RP11-451D3    |              |              |              | RP11-167K4  |
|  | 30 | Unknown | 12q23.1 |               | RP11-175P13  |              |              |             |

\*Where no breakpoint-spanning clone was identified, the proximal and distal flanking clones are given.

\*\*Number is the same as that used in Table S1.

“Del/Dup” indicates that a deletion or duplication was detected at or in *cis* with the breakpoint.

“BP” denotes “breakpoint.”
